# Supplementary material
Source: HighWire-hosted journal article supplement (https://bjo.bmj.com/content/106/9/1227)

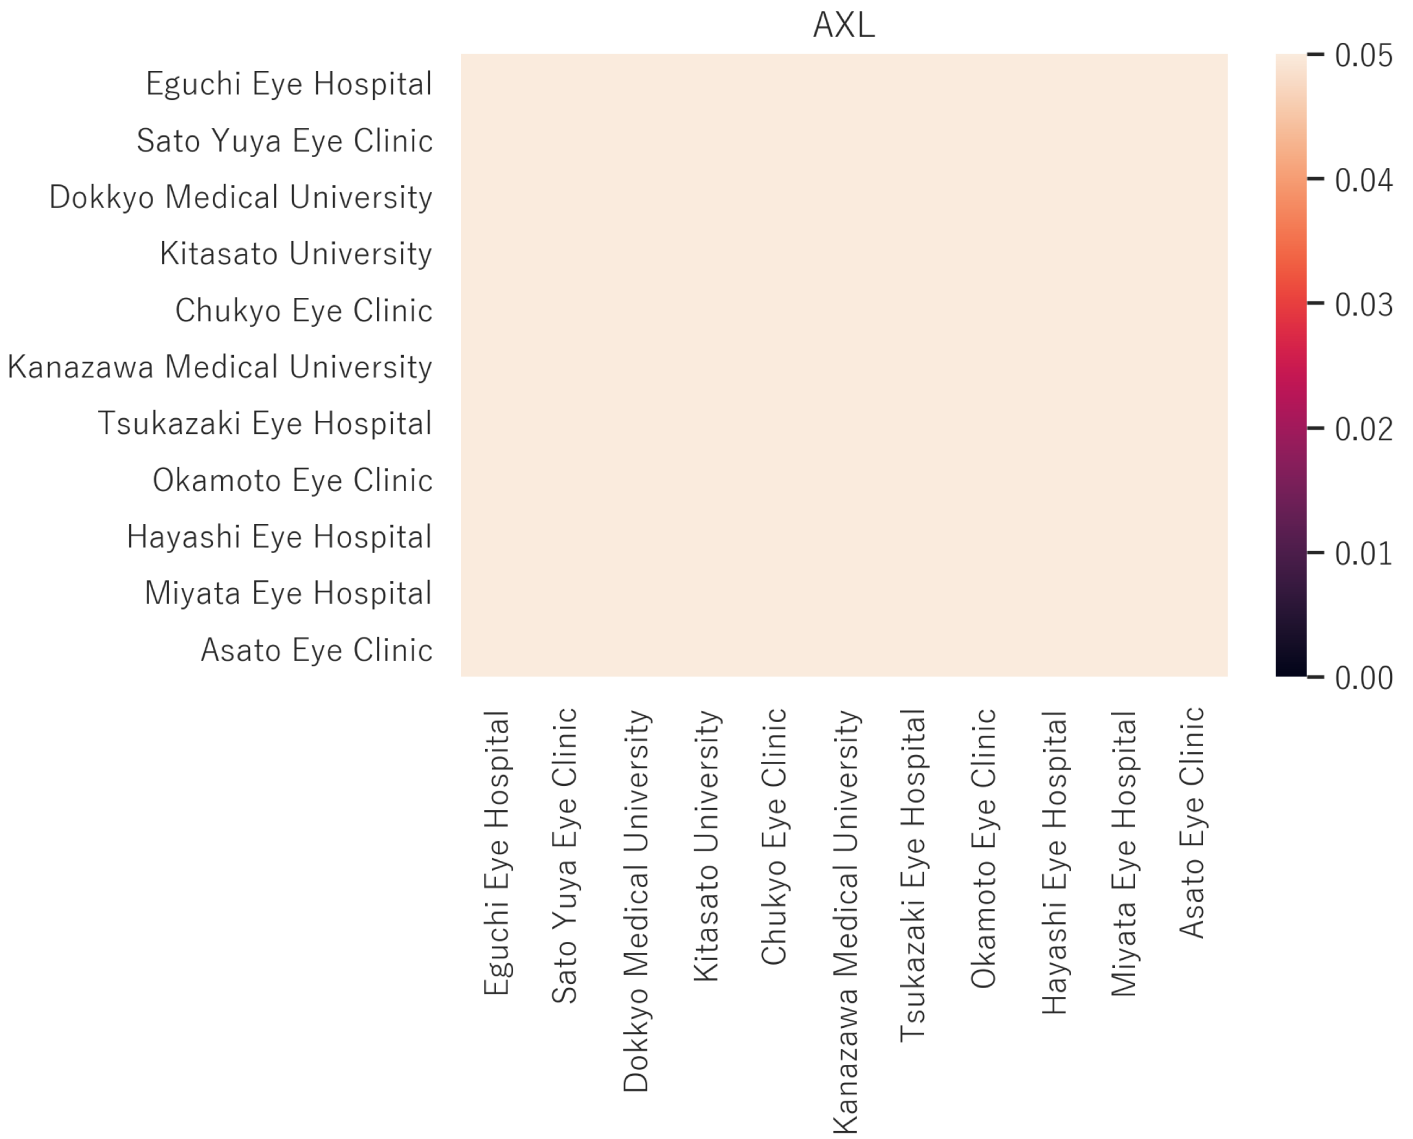

Supplement: inline-supplementary-material-2 [file inline-supplementary-material-2.pdf]

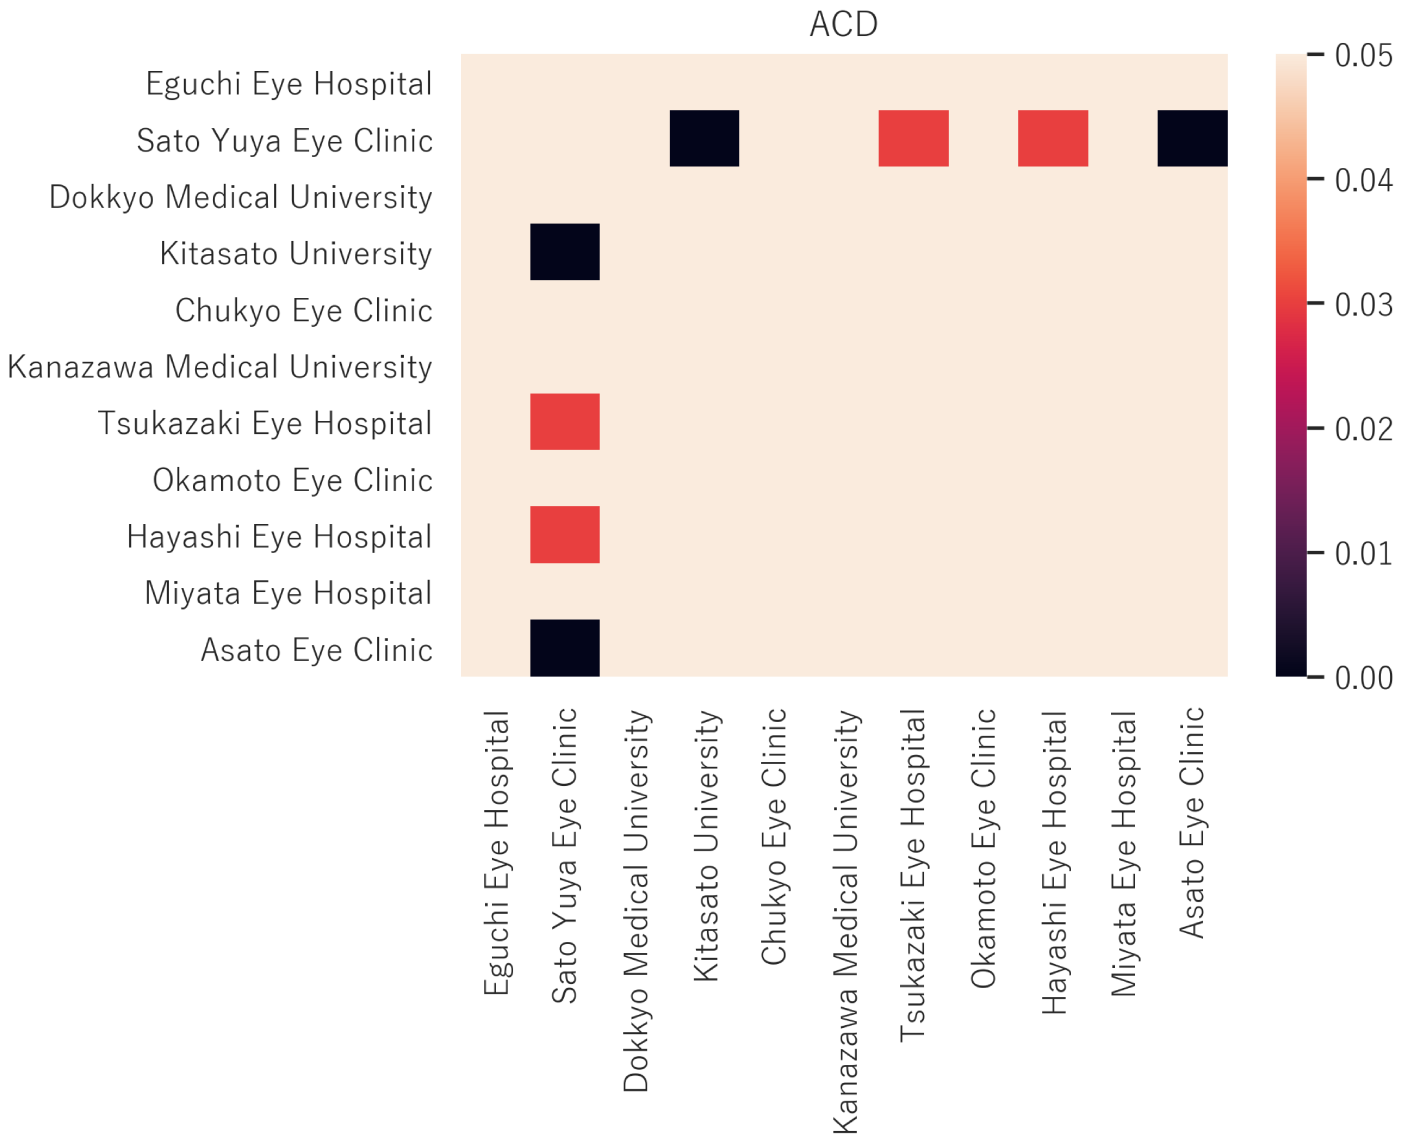

Supplement: inline-supplementary-material-3 [file inline-supplementary-material-3.pdf]

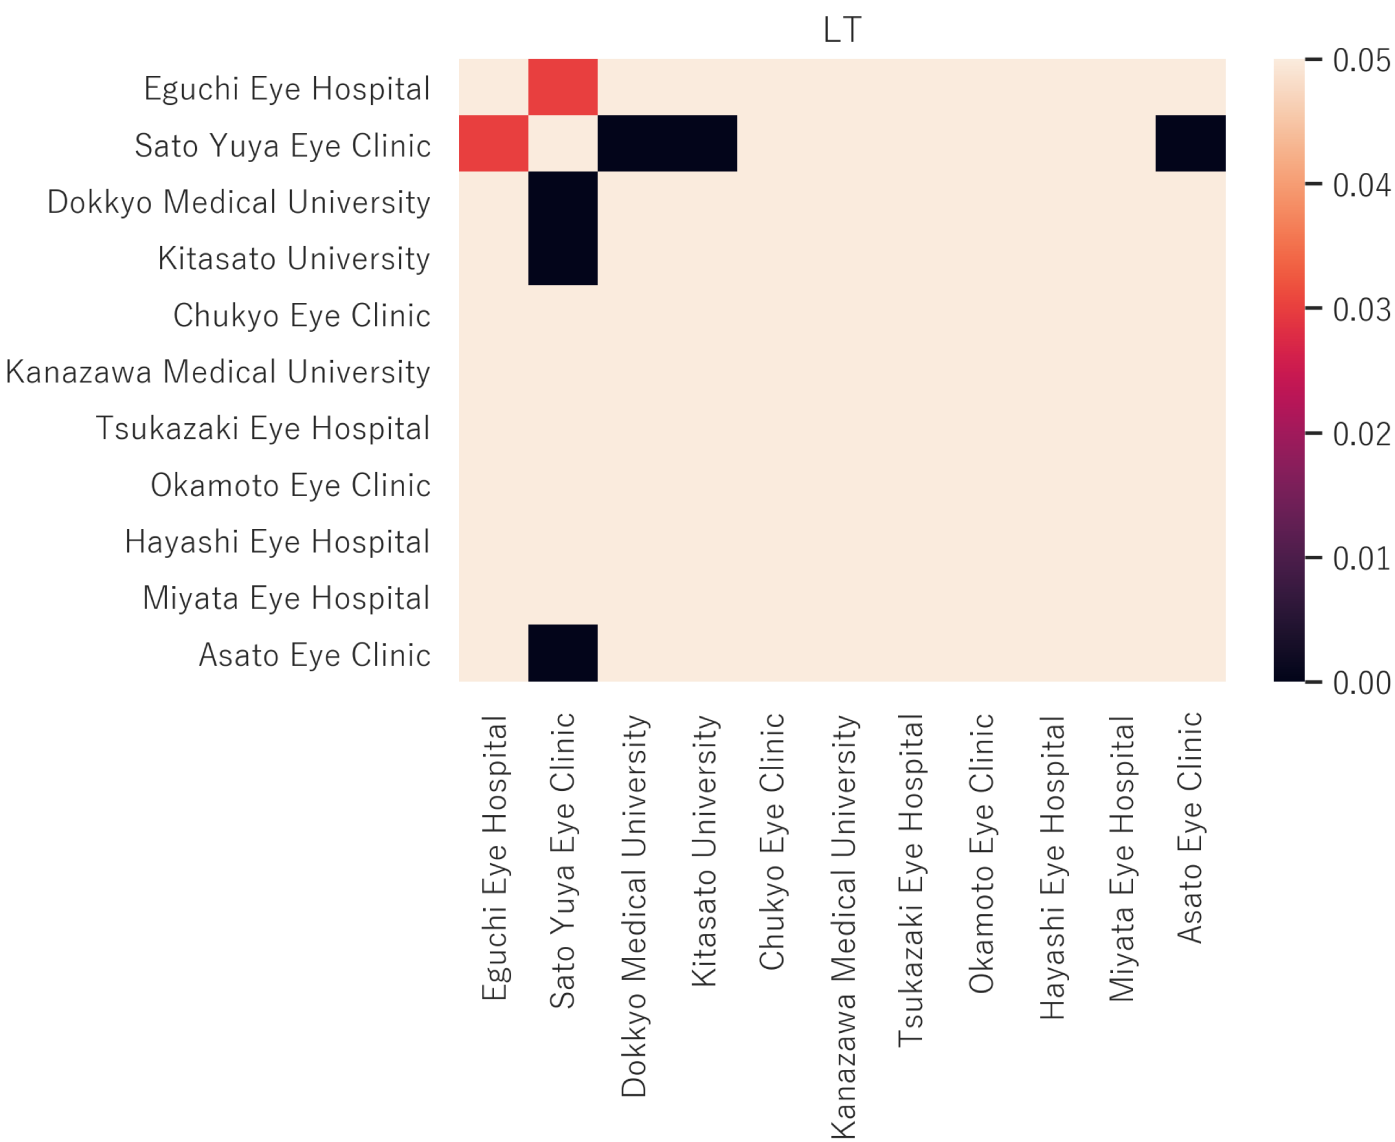

Supplement: inline-supplementary-material-4 [file inline-supplementary-material-4.pdf]

CCT

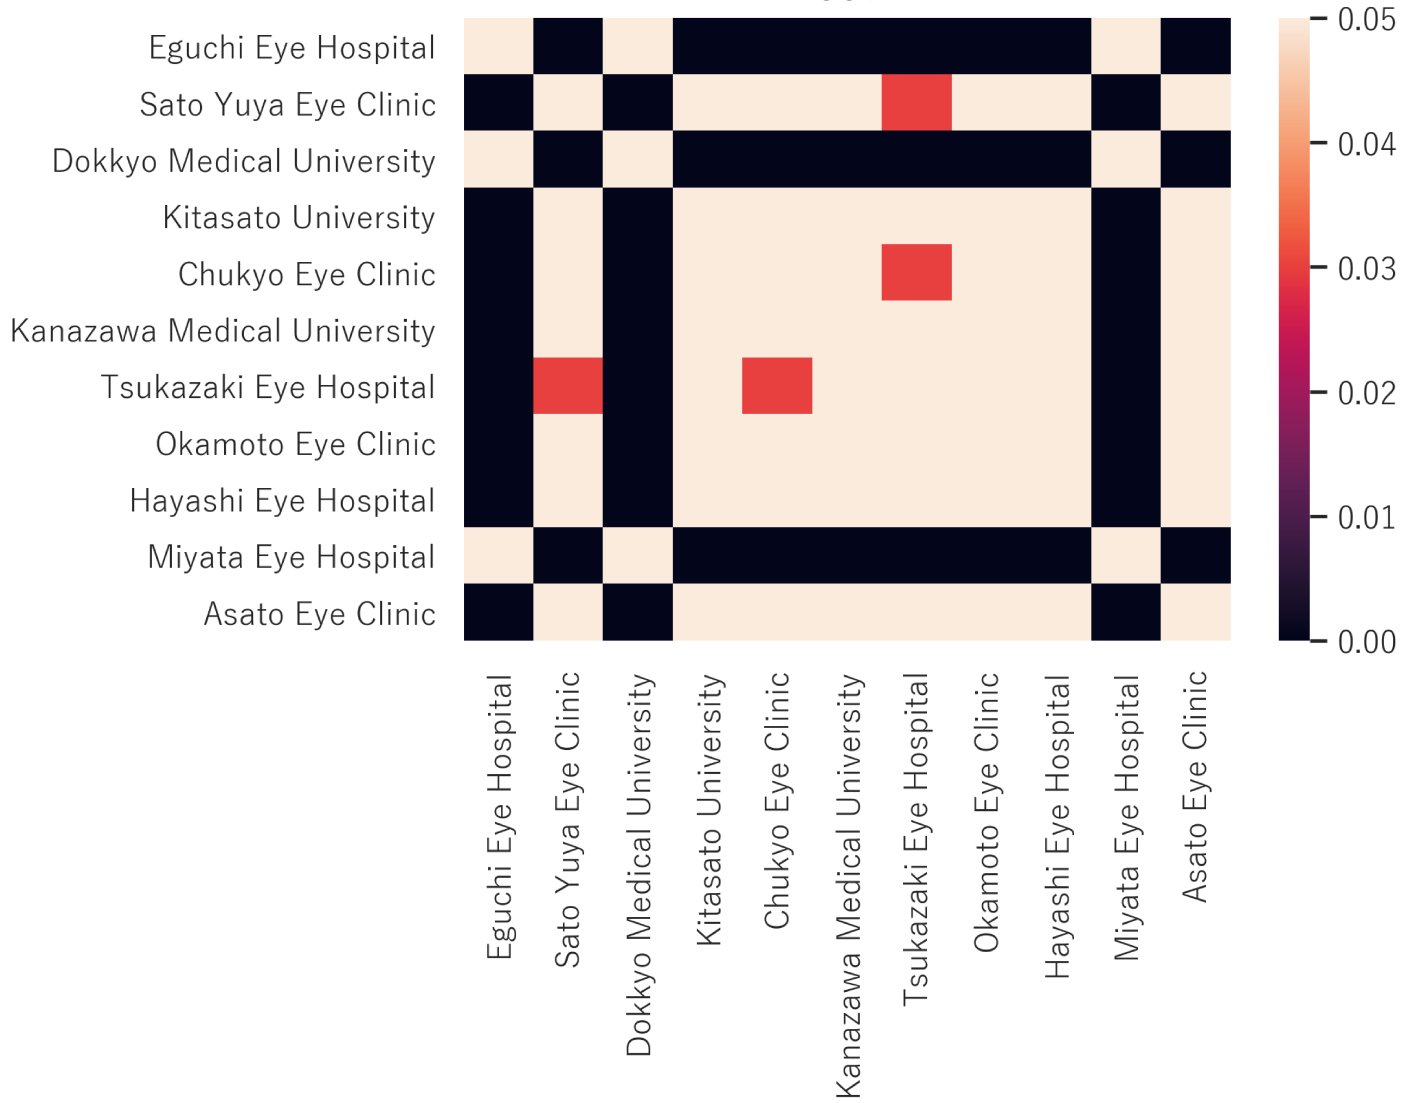

Supplement: inline-supplementary-material-5 [file inline-supplementary-material-5.pdf]

CA

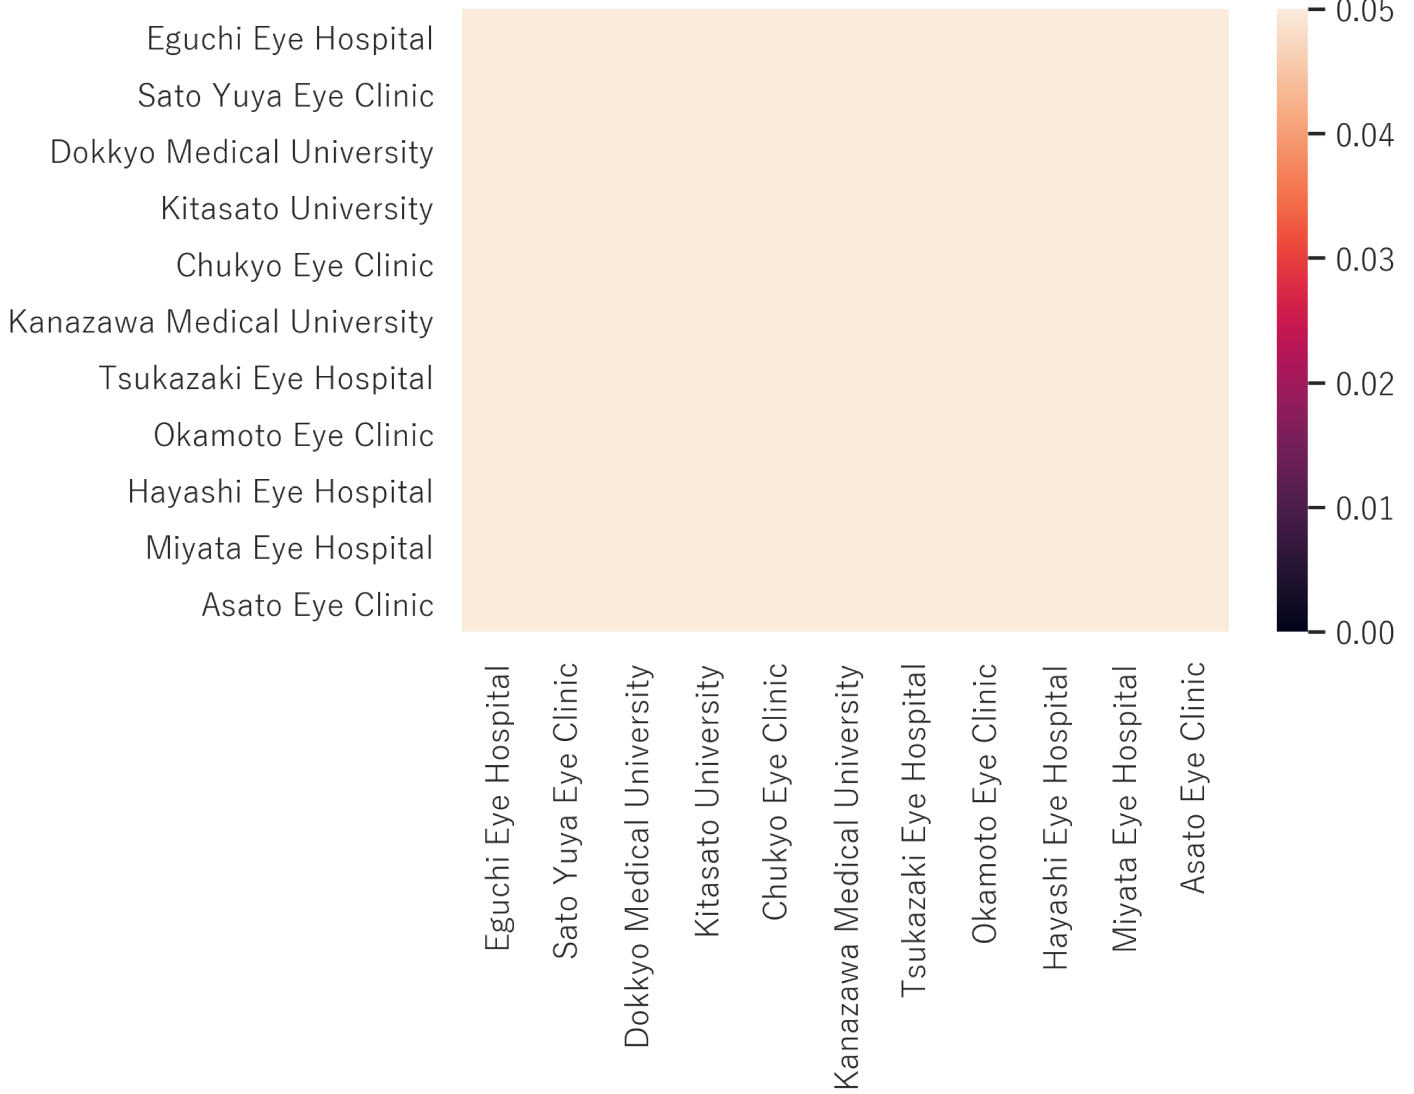

Supplement: inline-supplementary-material-6 [file inline-supplementary-material-6.pdf]
